# Supplementary material for: Hydrophobin CmHYD1 Is Involved in Conidiation, Infection and Primordium Formation, and Regulated by GATA Transcription Factor CmAreA in Edible Fungus, Cordyceps militaris
Source: MDPI journal article supplement (doi:10.3390/jof7080674), 2021-08-20
Supplement: s1 [file s1]

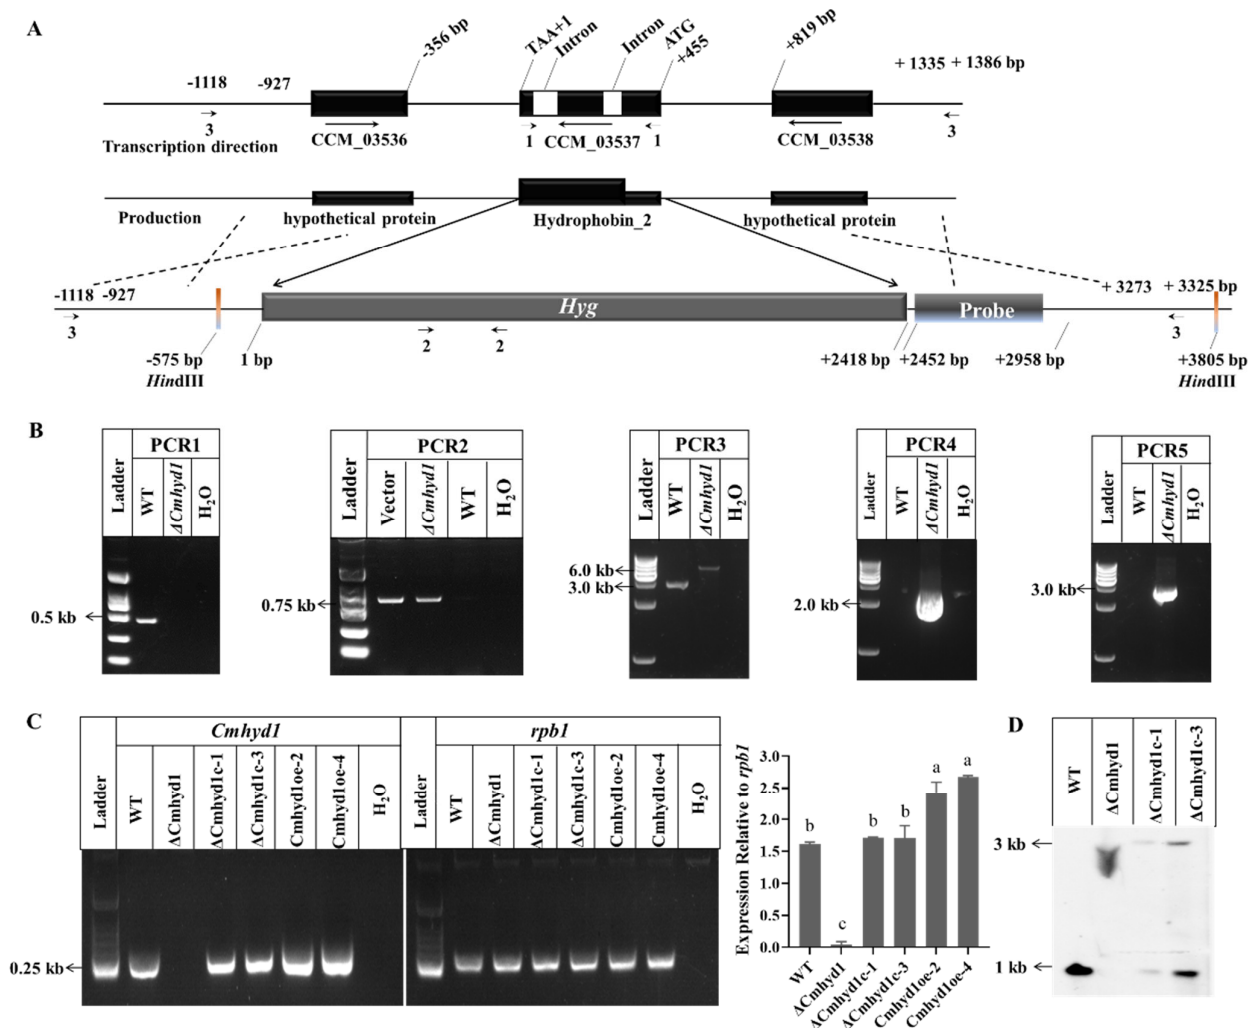

**Figure S1.** Generation and identification of *Cmhyd1* mutants in *Cordyceps militaris*. (A) Schematic diagram showing the generation of  $\Delta Cmhyd1$  via homologous recombination and southern blot analysis. Bases are numbered starting with the translational initiation codon for *Cmhyd1* (CCM\_03537). Hydrophobin\_2 was the functional domains in CmHYD1. CCM\_03536 and CCM\_03538 are the up- and downstream-genes of *Cmhyd1*, respectively. *Hyg* is the hygromycin resistance gene. Probe is for the southern blot hybridization. The primers 1 (Cmhyd1-verti-F/ Cmhyd1-verti-R), 2 (Hyg-F/Hyg-R), and 3 (Cmhyd1-up-F/ Cmhyd1-down-R) were for identification. (B) Confirmation of  $\Delta Cmhyd1$  by PCR. PCR1, PCR2, and PCR3 were performed with the primers 1, 2 and 3 respectively. PCR4 and PCR5 were performed with the primers 3F/2R and 2F/3R respectively. WT, the wild-type strain. DNA fragments with lengths of 421, 800, 4443, 2287 and 2956 bp were obtained using primer sets 1, 2, 3, 3F/2R and 2F/3R from the  $\Delta Cmhyd1$  strain, respectively. (C) The transcript levels of *Cmhyd1* in the WT and *Cmhyd1* mutants by RT-PCR. Total RNA extraction and cDNA synthesis were performed as described in the experimental procedures. Transcript levels of *Cmhyd1* and *rpb1* were detected with the primers qCmhyd1-F/qCmhyd1-R and qrp1-F/qrp1-R, respectively. The expression levels of *Cmhyd1* relative to *rpb1* were presented by optical density ratio using ImageJ. (D) Southern blot assay validating the *Cmhyd1* gene deletion and complementation strains. Lane 1: WT, Lanes 2:  $\Delta Cmhyd1$  strains, Lane 3 and 4:  $\Delta Cmhyd1$  complementation strain. Genomic DNAs were digested with *HindIII*/HindIII for probing *Cmhyd1*.

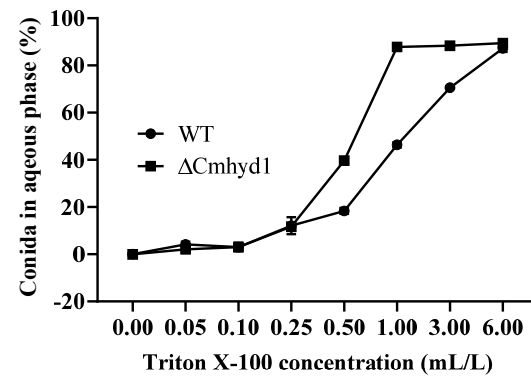

**Figure S2.** Hydrophobicity of the conidia determined using a MATH assay. Conidia of WT (●) and  $\Delta Cmhyd1$  (■) strains were suspended in PBS/hexadecane mixture and shaken vigorously. The amount of conidia in the aqueous phase in the presence of various amounts of Triton X-100 was shown (each point was the mean of three replicates). The more hydrophobic conidia required higher concentrations of detergent to release them from the oil-water interface.

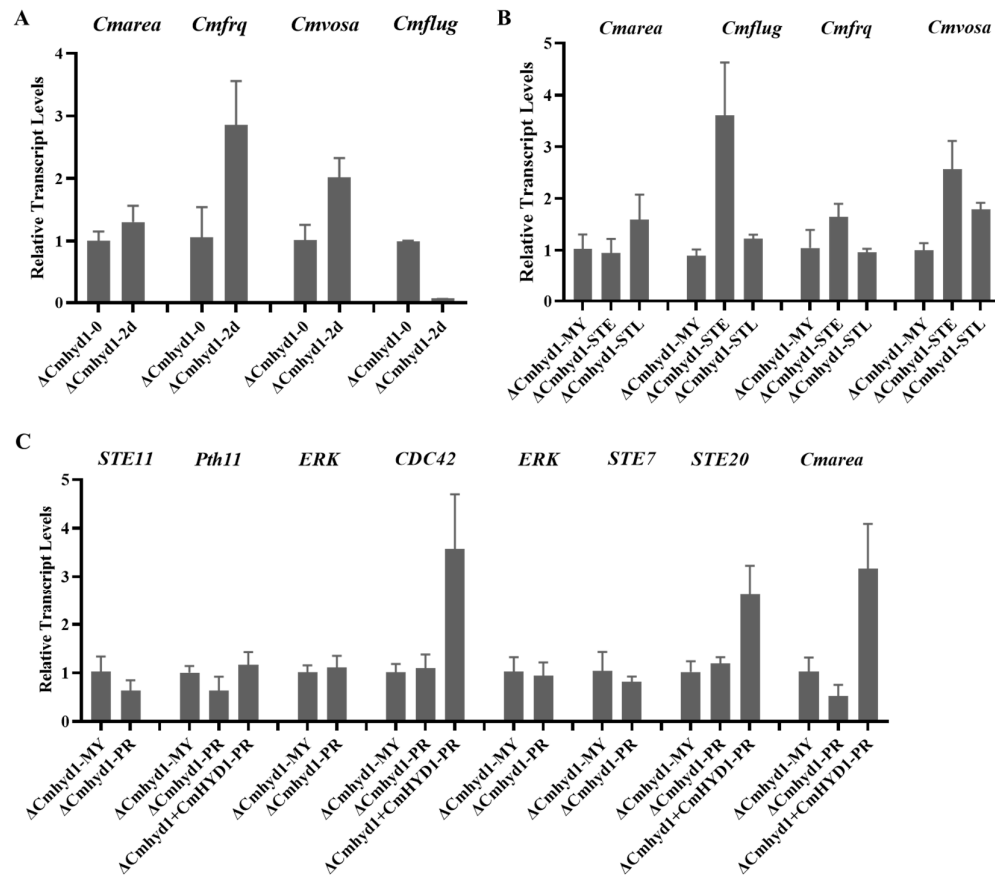

**Figure S3.** Relative transcript levels in the  $\Delta Cmhyd1$  strain. (A) The relative transcript levels of *Cmhyd1* and conidiation-related genes after being exposed to light for 2 d. All results were based on the standard levels of darkness stage of the  $\Delta Cmhyd1$  strain ( $\Delta Cmhyd1$ -0). (B) The relative transcript levels of *Cmhyd1* and infection-related genes at the different cuticle-bypassing infection stages. All results were based on the standard levels of the MY stage of  $\Delta Cmhyd1$  strain ( $\Delta Cmhyd1$ -MY). (C) The relative transcript levels of *Cmarea* and fruiting body development related genes at the primordium stage. All results were based on the standard levels of the MY stage of  $\Delta Cmhyd1$  strain ( $\Delta Cmhyd1$ -MY). Error bars indicate the standard deviation (SD) of three biological replicates with two technical replicates.

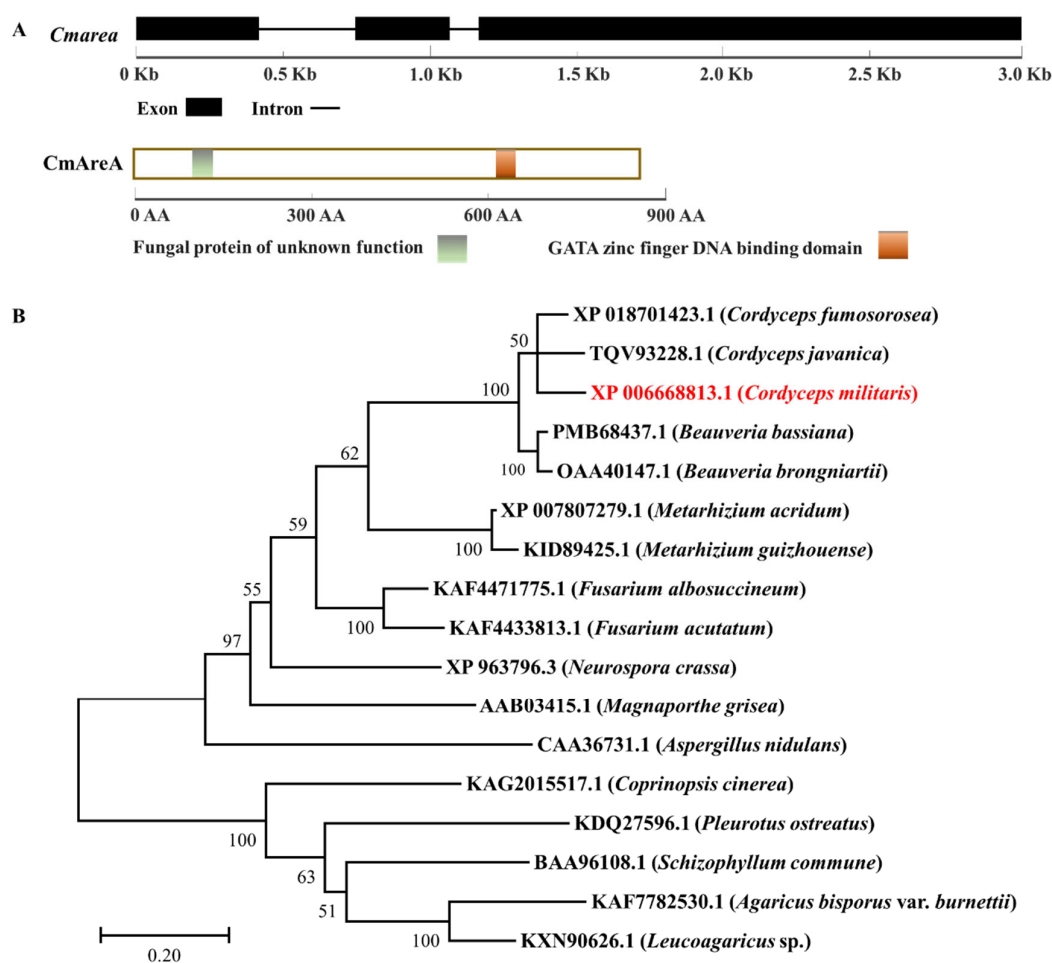

**Figure S4.** Characterization of the GATA zinc finger (ZnF) transcript factor gene *Cmarea* in *Cordyceps militaris*. (A) The gene structure and protein domains of *CmAreaA*. (B) Phylogenetic relationships of *CmAreaA* (red colored) and its homologs. The amino acid sequences were aligned with MEGAX, and a neighbor-joining tree was generated with 1000 bootstrap replicates using the program MEGAX.

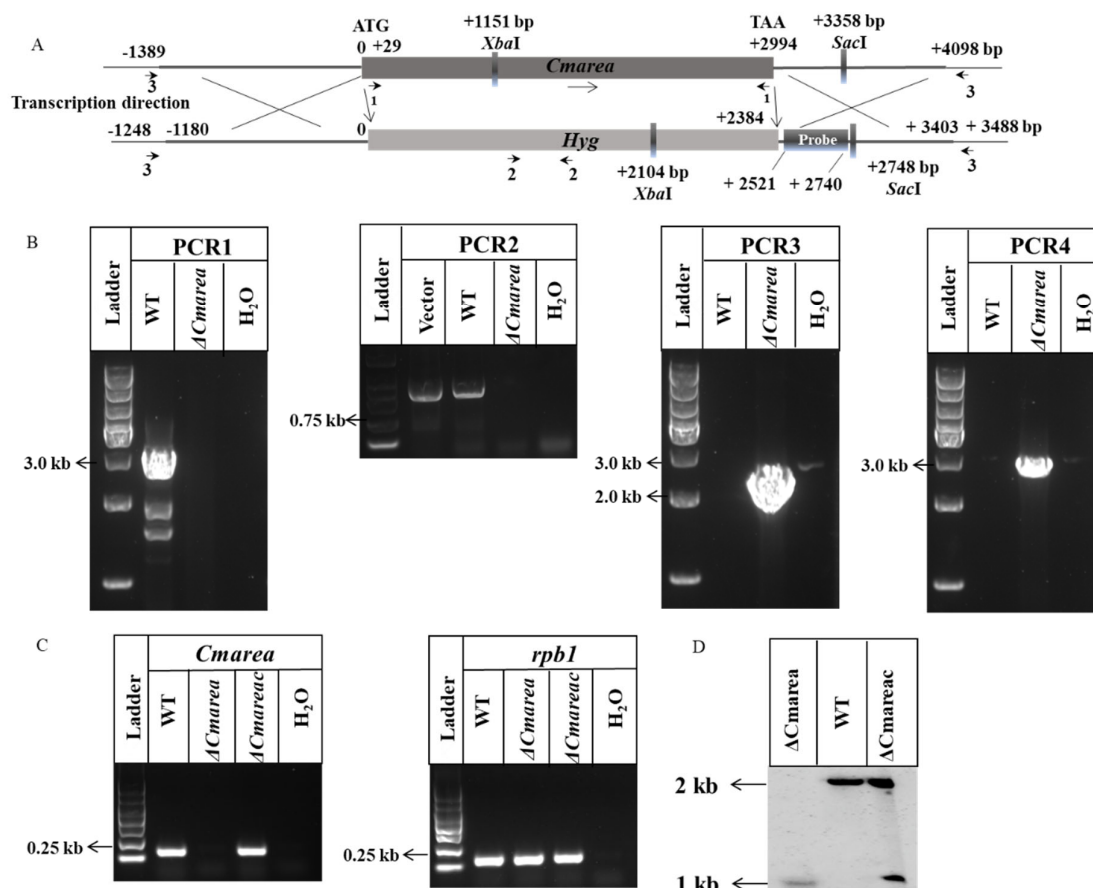

**Figure S5.** Generation and identification of *Cmarea* mutants in *Cordyceps militaris*. **(A)** Schematic diagram showing the generation of  $\Delta Cmarea$  via homologous recombination and southern blot analysis. **(B)** Confirmation of  $\Delta Cmarea$  by PCR. PCR1, PCR2, and PCR3 were performed with the primers 1, 2, 3F/2R and 2F/3R respectively. WT, the wild-type strain. DNA fragments with lengths of 2664, 800, 2417 and 3119 bp were obtained using primer sets 1, 2, 3F/2R and 2F/3R from the  $\Delta Cmhyd1$  strain respectively. **(C)** The transcript levels of *Cmarea* in the WT,  $\Delta Cmarea$  and  $\Delta Cmarea$ ac strains using RT-PCR. Total RNA extraction and cDNA synthesis were performed as described in the experimental procedures. Transcript levels of *Cmarea* and *rpb1* were detected with the primers qCmarea-F/qCmarea-R and qrpbl-F/qrpbl-R, respectively. **(D)** Southern blot assay validating the *Cmarea* gene deletion and complementary strains. Lane 1:  $\Delta Cmarea$  strain for 1254 bp, Lane 2: WT strain for 2207 bp, Lane 3:  $\Delta Cmarea$  complementary strain for 1254 and 2207 bp. Genomic DNAs were digested with Xba I /Sac I for probing *Cmarea* in southern blot hybridization.

**Table S1.** Primers used in this study.

| Primer Name             | Primer Sequence (5' to 3') |
|-------------------------|----------------------------|
| rpb1-F                  | CTGTTCCCCCTCCTCCTGTG       |
| rpb1-R                  | ATGTTGCGGCGATCCTTCTC       |
| qPCR- <i>Cmhyd1</i> -F  | CCTCTACTCCAACCCCATCTG      |
| qPCR- <i>Cmhyd1</i> -R  | AGGACTGCCTGGTCAATCAC       |
| <i>Cmhyd1</i> -verti-F1 | GCAAGTCCTTCTCATTGCTAC      |
| <i>Cmhyd1</i> -verti-R1 | GCCTGGTCAATCTGTTTCAGATG    |
| <i>Hyg</i> -verti-F2    | CTGTTCGAGAAGTTTCTGATCG     |
| <i>Hyg</i> -verti-R2    | CTGATAGAGTTGGTCAAGACC      |
| <i>Cmhyd1</i> -verti-F3 | GCTTTCTGCATAGTTTTCTCCATT   |

|                                   |                                                    |
|-----------------------------------|----------------------------------------------------|
| <i>Cmhyd1</i> -verti-R3           | ACCAAGTGTTACATTAATTGAAAGC                          |
| Sothern Blot-<br><i>Cmhyd1</i> -F | TGGGCTGTTCTTGTCTCTGC                               |
| Sothern Blot-<br><i>Cmhyd1</i> -R | GGCGAAATGTAAACGGAGC                                |
| qPCR- <i>Cmare</i> a-F            | TGCCATCCATCTCGTCCAC                                |
| qPCR- <i>Cmare</i> a-R            | TGAGCCACTCCCATTCTG                                 |
| <i>Cmare</i> a-verti-F1           | AACCAGCAACGCATGGAAAACCTC                           |
| <i>Cmare</i> a-verti-R1           | TTACAGACTCATCGTGAGCCACTC                           |
| <i>Cmare</i> a-verti-F3           | TTCCAACAGCCAGACAAACAAGAC                           |
| <i>Cmare</i> a-verti-R3           | ATAGCCTTGTTGCTACGTTTACGAG                          |
| Sothern Blot-<br><i>Cmare</i> a-F | CTACTCTTGCGTGTTTCTTTTATAC                          |
| Sothern Blot-<br><i>Cmare</i> a-R | GTAGTCCAAGGAGATTAAGCGC                             |
| <i>Cmare</i> a-verti-F            | AACCAGCAACGCATGGAAAACCTC                           |
| <i>Cmare</i> a-verti-R            | TTACAGACTCATCGTGAGCCACTC                           |
| Biotin probe 1                    | TTCGCCTTCTCACCATCCCAAGATACTCCCATCAGCCAAGATGCAA     |
| Biotin probe 2                    | GAGGACAACGATCCTCTCCTTGATACTCACAGGCCTGACTTCAAA<br>C |
| Unlable                           | CAGTGAGACGGGACCGGCATCGATAGAACGCTGCAGCCACTGCC<br>AA |
